# Supplementary material for: Synthesis of allyl cellulose in NaOH/urea aqueous solutions and its thiol–ene click reactions
Source: Royal Society of Chemistry journal article supplement (doi:10.1039/c5py00301f), 2015-01-01
Supplement: c5py00301f1.pdf [file c5py00301f1.pdf]

Electronic Supplementary Information

**Synthesis of allyl cellulose in NaOH/urea aqueous solutions  
and its thiol-ene click reactions**

Haoze Hu, Jun You, Weiping Gan, Jinping Zhou\* and Lina Zhang

*Department of Chemistry and Key Laboratory of Biomedical Polymers of Ministry of*

*Education, Wuhan University, Wuhan, 430072, China*

*Tel: +86-27-68752977, Fax: +86-27-68754067; E-mail: zhoujp325@whu.edu.cn*

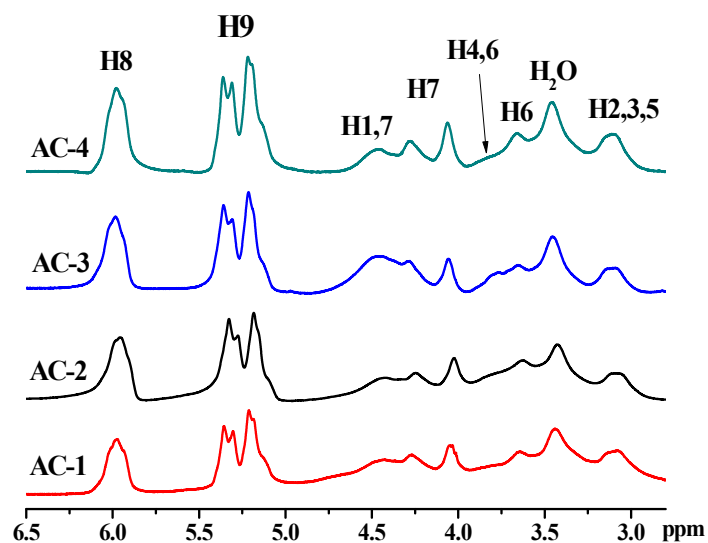

**Figure S1.**  $^1\text{H}$  NMR spectra of AC-1 (DS=0.98), AC-2 (DS=1.09), AC-3 (DS=1.32) and AC-4 (DS=1.65) in  $\text{DMSO-}d_6$  at 65 °C.

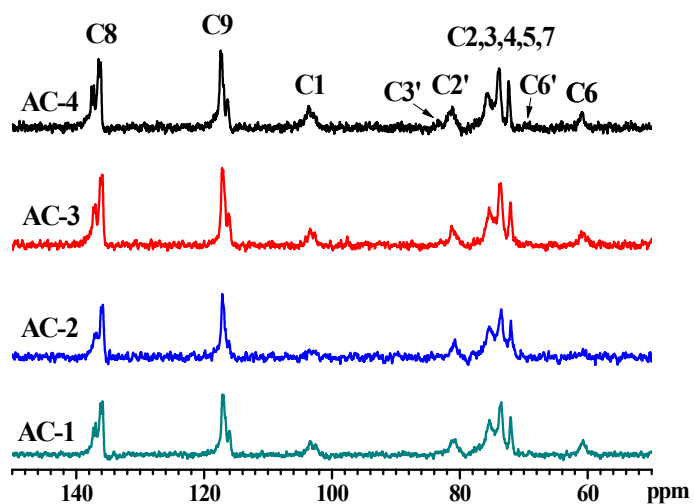

**Figure S2.**  $^{13}\text{C}$  NMR spectra of AC-1 (DS=0.98), AC-2 (DS=1.09), AC-3 (DS=1.32) and AC-4 (DS=1.65) in  $\text{DMSO-}d_6$  at 65 °C.
